# Supplementary material
Source: PubMed Central journal article supplement (PMC5930364)
Supplement: AEM.02855-17_zam010188508s1.pdf [file AEM.02855-17_zam010188508s1.pdf]

**Table S1.** Genomic characteristics of sequenced phages in this study

| <b>Phage</b> | <b>Lineage</b> | <b>Genome<br/>length (kb)</b> | <b>GC %</b> | <b>No. predicted<br/>ORFs</b> | <b>Similarity to STP1<br/>(% nt id/coverage)</b> | <b>Genbank<br/>accession no.</b> |
|--------------|----------------|-------------------------------|-------------|-------------------------------|--------------------------------------------------|----------------------------------|
| STP1         | 1              | 35.283                        | 39.0        | 41                            | 100/100                                          | MF580773                         |
| STP2         | 1              | 35.286                        | 38.5        | 44                            | 99/99                                            | MF580774                         |
| A0           | 1              | 35.481                        | 38.9        | 44                            | 95/90                                            | MF580765                         |
| B0           | 1              | 36.773                        | 38.9        | 47                            | 99/92                                            | MF580766                         |
| C0           | 1              | 34.718                        | 39.0        | 42                            | 94/90                                            | MF580768                         |
| B5           | 1              | 35.636                        | 38.6        | 42                            | 99/91                                            | MF580767                         |
| L5A1         | 1              | 36.884                        | 38.9        | 44                            | 96/91                                            | MF580769                         |
| 7A5          | 1              | 35.936                        | 38.7        | 44                            | 99/88                                            | MF580759                         |
| 31B4         | 2              | 36.438                        | 39.0        | 40                            | 95/77                                            | MF580764                         |
| 16B8         | 2              | 34.379                        | 38.6        | 38                            | 96/75                                            | MF580763                         |
| 9B4          | 2              | 34.636                        | 38.7        | 41                            | 96/74                                            | MF580762                         |
| 7T           | 2              | 35.141                        | 39.2        | 41                            | 96/78                                            | MF580760                         |
| V2           | 2              | 34.698                        | 38.7        | 40                            | 95/77                                            | MF580775                         |
| R1           | 2              | 34.652                        | 38.7        | 39                            | 95/77                                            | MF580772                         |
| MM25         | 3              | 34.059                        | 39.0        | 41                            | 96/68                                            | MF580771                         |
| 9A           | 3              | 35.604                        | 39.5        | 41                            | 91/60                                            | MF580761                         |
| M19          | 4              | 34.328                        | 38.9        | 44                            | 93/69                                            | MF580770                         |

**Table S2.** Bacterial strains used in this study

| <i>S. thermophilus</i> strain | Source          |
|-------------------------------|-----------------|
| P1                            | UCC collection  |
| P2                            | UCC collection  |
| P3                            | UCC collection  |
| P4                            | UCC collection  |
| P5                            | UCC collection  |
| P6                            | UCC collection  |
| P7                            | UCC collection  |
| P8                            | UCC collection  |
| P9                            | UCC collection  |
| P10                           | UCC collection  |
| P11                           | UCC collection  |
| P12                           | UCC collection  |
| P13                           | UCC collection  |
| P14                           | UCC collection  |
| P15                           | UCC collection  |
| P16                           | UCC collection  |
| P17                           | UCC collection  |
| P18                           | UCC collection  |
| P19                           | UCC collection  |
| P20                           | UCC collection  |
| P21                           | UCC collection  |
| CNRZ447                       | CNRZ collection |
| CNRZ160                       | CNRZ collection |
| CNRZ385                       | CNRZ collection |
| CNRZ887                       | CNRZ collection |
| CNRZ1443                      | CNRZ collection |
| CNRZ1151                      | CNRZ collection |
| CNRZ1202                      | CNRZ collection |
| MM1                           | UCC collection  |
| MM7                           | UCC collection  |
| MM20                          | UCC collection  |
| M8                            | UCC collection  |
| MM8                           | UCC collection  |
| MM15                          | UCC collection  |
| MM21                          | UCC collection  |
| AVA1122                       | UCC collection  |
| AVA116                        | UCC collection  |
| AVA117                        | UCC collection  |
| AVA118                        | UCC collection  |
| AVA119                        | UCC collection  |
| STR1                          | UCC collection  |
| STR2                          | UCC collection  |
| 4033                          | UCC collection  |
| 1205.3                        | UCC collection  |
| 4149                          | UCC collection  |
| 4031                          | UCC collection  |
| 4097                          | UCC collection  |
| 1A                            | UCC collection  |
| 4145                          | UCC collection  |

---

|      |                |
|------|----------------|
| 4043 | UCC collection |
| 4053 | UCC collection |
| 4137 | UCC collection |

---
